# Supplementary material for: Facilitators and barriers to the implementation of Community-Based Medication Adherence Support for Aging Individuals with HIV and Hypertension in western Kenya
Source: Research Square preprint supplement (doi:10.21203/rs.3.rs-6897280/v1), 2025-06-30
Supplement: Supplementary file 1 [file fa25e78c444161d0336b9eb9.docx]

**Appendix 1: Analysis code within CFIR domains and constructs**

**Intervention characteristics**

This domain encompasses the attributes of CBA intervention that make it easy or harder to implement.

- - *Perceived Relative Advantage and Adaptability:* This refers to perceptions that the Community-Based Adherence (CBA) intervention is superior to current practices and can be modified or tailored to fit the local context.
  - *Complexity:* This captures the perceived difficulty of implementing CBA intervention, which may be influenced by its scope, the nature of its components, and the number of elements involved.
  - *Cost:* This pertains to the perceived financial implications of implementing CBA intervention and whether it is considered affordable.

**Process of Implementation**

This domain encompasses the activities and strategies employed to introduce and integrate CBA intervention. The key components include:

- - - *Planning:* Identifying roles and responsibilities, outlining specific steps and milestones, and defining goals and measures for successful implementation.
    - *Teaming and Engagement:* Actively involving stakeholders in the implementation process.
    - *Execution:* Carrying out the intervention as designed while adapting to emerging challenges.

**Outer Setting**

The domain covers macrolevel factors that may influence the implementation of CBA.

- *Patient needs and resources:* This captures the extent to which the intervention considers the existing needs of patients and prioritizes them on the basis of available resources to meet their needs.
  - *External Policies and Incentives:* This includes funding from external entities (e.g., grants or reimbursements) to support the implementation and delivery of CBA intervention, as well as any policies governing the role of community health volunteers (CHVs) in the community.

**Inner Setting**

This domain describes the factors that influence the implementation of CBA within the setting in which it is being implemented.

- - *Team Culture:* The shared values, beliefs, and norms among healthcare providers, CHVs, patients, and caregivers foster formal and informal relationships to support the implementation of CBA intervention.
  - *Mission Alignment:* Ensuring that the implementation and delivery of the intervention align with the overarching goals and commitment of the HIV care delivery program.

**Individual characteristics**

These are the personal attributes of the individuals engaged in the implementation of CBA, OALW and CHVs.

- - *Beliefs:* The perceptions held by older adults regarding hypertension and its treatment, as well as how CBA intervention can influence these beliefs.
  - *Knowledge:* Information and understanding are necessary for individuals to effectively manage or support their adherence to hypertension treatment.
  - *Other Personal Attributes:* The personal qualities of CHVs that facilitate successful intervention delivery, such as empathy and trust.
